# Supplementary material
Source: publisher site journal article supplement (https://www.dovepress.com/get_supplementary_file.php?f=366937.docx)
Supplement: Supplementary file 1 [file get_supplementary_file.php]

**
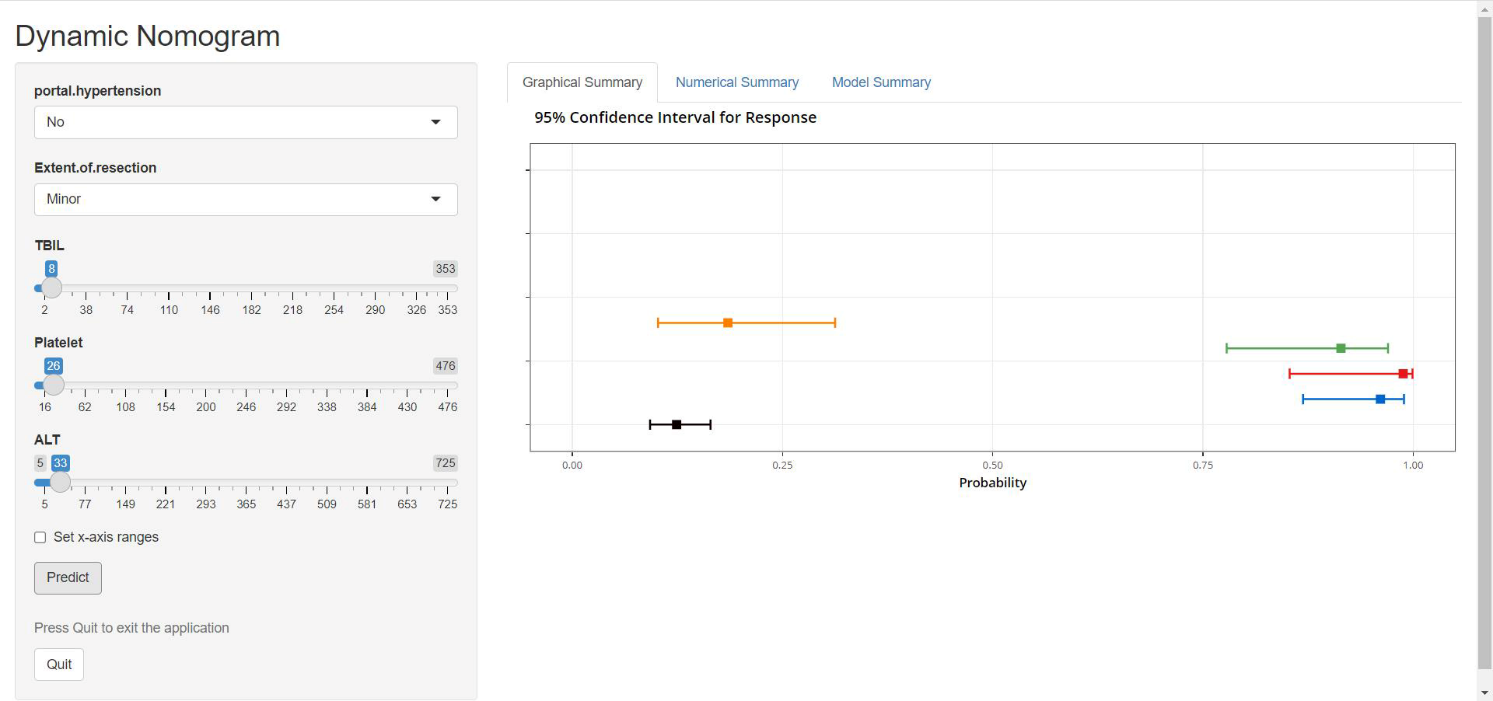
**

**Figure S1.** The web-based calculator for predicting the probability of post-hepatectomy liver failure


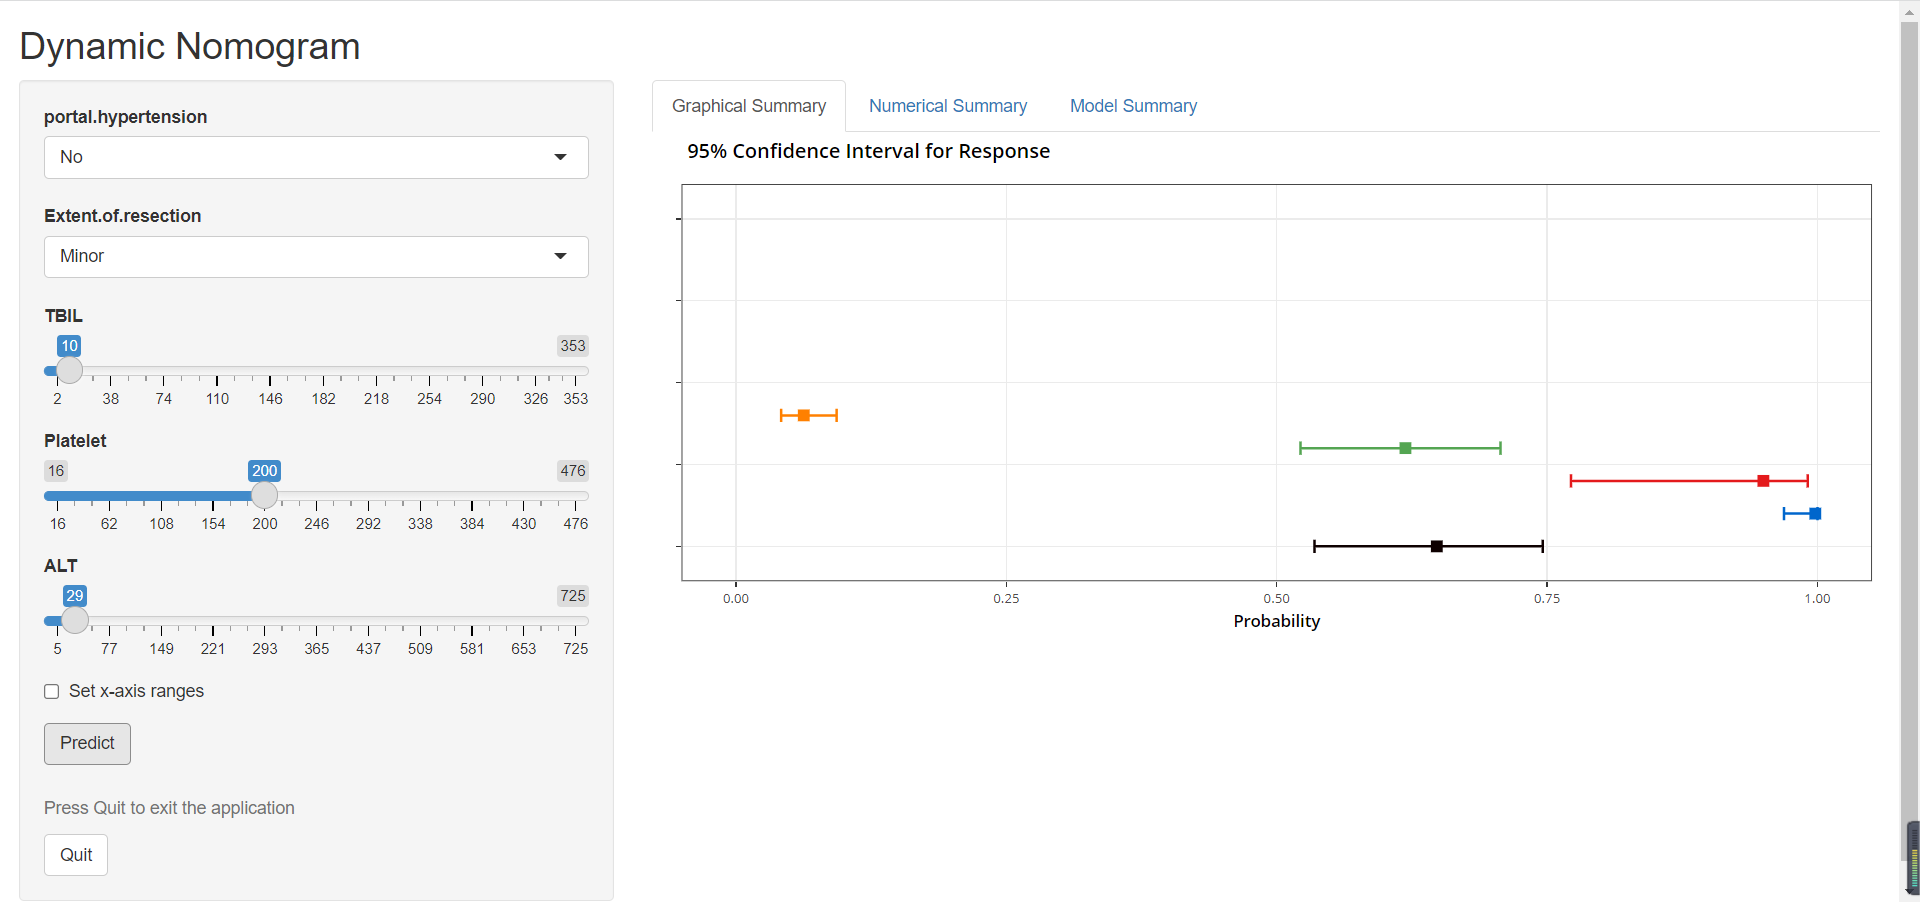


**Figure S2.** The web-based calculator for predicting the probability of post-hepatectomy liver failure class B+C.
